# Supplementary material
Source: PubMed Central journal article supplement (PMC4340820)
Supplement: NIHMS622006-supplement-SDC_2.pdf [file NIHMS622006-supplement-SDC_2.pdf]

Change in anthropometry, body composition, and macronutrient composition by intervention condition.

| Outcome Variable           | Intervention Group | Baseline   | Change from Baseline to 6 Months | Change from Baseline to 12 Months | Change from Baseline to 18 Months | p-values for Main Effects |        |              | p-values for Group X Time Interaction Effects |                |                   |
|----------------------------|--------------------|------------|----------------------------------|-----------------------------------|-----------------------------------|---------------------------|--------|--------------|-----------------------------------------------|----------------|-------------------|
|                            |                    |            |                                  |                                   |                                   | Time                      | Group  | Group X Time | ADOPT vs. MAINTAIN                            | ADOPT vs. SBWP | MAINTAIN vs. SBWP |
| Waist (cm)                 | ADOPT (N=64)       | 108.2±1.5  | -9.7±1.2                         | -8.3±1.5                          | -5.5±1.9                          | 0.0450                    | <.0001 | 0.0700       | 0.0355                                        | 0.2238         | 0.2235            |
|                            | MAINTAIN (N=62)    | 107.9±1.5  | -11.1±1.2                        | -14.1±1.5                         | -10.4±1.7                         |                           |        |              |                                               |                |                   |
|                            | SBWP (N=69)        | 105.2±1.4  | -9.4±1.2                         | -10.1±1.5                         | -6.5±1.8                          |                           |        |              |                                               |                |                   |
| Hip (cm)                   | ADOPT (N=64)       | 117.2±1.0  | -8.4±0.8                         | -7.5±1.0                          | -6.3±1.2                          | 0.7177                    | <.0001 | 0.0009       | 0.0007                                        | 0.4688         | 0.0022            |
|                            | MAINTAIN (N=62)    | 117.3±1.0  | -7.5±0.8                         | -9.7±1.0                          | -7.7±1.1                          |                           |        |              |                                               |                |                   |
|                            | SBWP (N=69)        | 116.1±1.0  | -8.5±0.8                         | -8.1±1.0                          | -6.8±1.2                          |                           |        |              |                                               |                |                   |
| Waist-to-Hip Ratio         | ADOPT (N=64)       | 0.92±0.01  | -0.02±0.01                       | -0.01±0.01                        | -0.00±0.01                        | 0.0083                    | 0.0039 | 0.4860       | 0.4334                                        | 0.2968         | 0.6197            |
|                            | MAINTAIN (N=62)    | 0.92±0.01  | -0.04±0.01                       | -0.05±0.01                        | -0.03±0.01                        |                           |        |              |                                               |                |                   |
|                            | SBWP (N=69)        | 0.90±0.01  | -0.02±0.01                       | -0.03±0.01                        | -0.01±0.01                        |                           |        |              |                                               |                |                   |
| Sagittal Diameter (cm)     | ADOPT (N=64)       | 25.64±0.35 | -2.8±0.3                         | -2.5±0.3                          | -1.7±0.4                          | 0.0430                    | <.0001 | 0.0896       | 0.0972                                        | 0.3884         | 0.0581            |
|                            | MAINTAIN (N=62)    | 25.42±0.35 | -3.3±0.3                         | -3.6±0.4                          | -2.9±0.4                          |                           |        |              |                                               |                |                   |
|                            | SBWP (N=69)        | 24.49±0.34 | -2.8±0.3                         | -2.4±0.4                          | -2.0±0.4                          |                           |        |              |                                               |                |                   |
| Percent Body Fat           | ADOPT (N=64)       | 40.7±0.6   | -4.9±0.6                         | -3.8±0.8                          | -2.5±0.8                          | 0.2202                    | <.0001 | 0.0345       | 0.0271                                        | 0.5605         | 0.0525            |
|                            | MAINTAIN (N=62)    | 40.5±0.6   | -5.1±0.6                         | -5.8±0.8                          | -4.5±0.8                          |                           |        |              |                                               |                |                   |
|                            | SBWP (N=69)        | 40.2±0.6   | -4.9±0.5                         | -4.0±0.8                          | -2.7±0.8                          |                           |        |              |                                               |                |                   |
| Dietary Fat Intake (%)     | ADOPT (N=64)       | 40.6±0.8   | -8.5±0.8                         | -6.41±0.9                         | -5.09±1.0                         | 0.1444                    | <.0001 | 0.2981       | 0.1164                                        | 0.5319         | 0.5870            |
|                            | MAINTAIN (N=62)    | 38.5±0.8   | -9.6±0.8                         | -8.33±0.9                         | -8.23±1.0                         |                           |        |              |                                               |                |                   |
|                            | SBWP (N=69)        | 38.8±0.8   | -8.6±0.8                         | -6.65±0.9                         | -6.41±1.0                         |                           |        |              |                                               |                |                   |
| Dietary Protein Intake (%) | ADOPT (N=64)       | 14.7±0.4   | 2.9±0.4                          | 2.06±0.4                          | 1.84±0.5                          | 0.7674                    | 0.0005 | 0.6478       | 0.3905                                        | 0.5319         | 0.8056            |
|                            | MAINTAIN (N=62)    | 13.9±0.4   | 2.4±0.4                          | 1.99±0.4                          | 1.92±0.5                          |                           |        |              |                                               |                |                   |
|                            | SBWP (N=69)        | 14.5±0.4   | 2.8±0.4                          | 2.31±0.4                          | 2.15±0.5                          |                           |        |              |                                               |                |                   |
| Dietary CHO Intake (%)     | ADOPT (N=64)       | 44.9±1.0   | 5.8±1.0                          | 5.07±1.1                          | 3.25±1.1                          | 0.2594                    | 0.0015 | 0.1872       | 0.0541                                        | 0.4453         | 0.3450            |
|                            | MAINTAIN (N=62)    | 47.4±1.0   | 7.2±1.0                          | 6.22±1.0                          | 6.70±1.1                          |                           |        |              |                                               |                |                   |
|                            | SBWP (N=69)        | 47.3±1.0   | 6.5±0.9                          | 5.16±1.0                          | 4.59±1.1                          |                           |        |              |                                               |                |                   |
